# Supplementary material
Source: Research Square preprint supplement (doi:10.21203/rs.3.rs-9584886/v1)
Supplement: Supplementary file 1 [file a580a2cbb01ae7fb7c798f7f.docx]

**Supplementary Text**

**Supplementary 1**

Additional conversions were made to the covered national characteristic numbers 22 (“Ear: development of sterile spikelets”), 30 (“Awn: length (compared to ear)”) and 41 (Ear: shape), which had all changed scoring scales and/or characteristic name over the testing period of the varieties included in the study. For example, from 1981 to 1995 the characteristic “Awn: length (compared to ear)” (national characteristic number 30) was represented on a 1 to 3 scale (shorter, equal and longer, respectively). From 1996 onwards, this was changed to a 1 to 9 scale (3 = short, 5 = medium and 7 = long). The characteristic “Ear: shape” (national characteristic number 41) had similarly changed from a 1 to 3 scale (tapering, parallel and fusiform, respectively) from 1981 to 1995 and a 3 to 7 scale (3 = tapering, 5 = parallel, 7 = fusiform) from 1996 onwards. For the characteristic “Ear: development of sterile spikelets” (national characteristic number 22), the characteristic name was changed from “Sterile spikelet: length of lemma” which was scored on a continuous scale from 1 (fully absent/deficiens), 2 (very short/deficiens), 3 (short) to 9 (very long) up until 2002. From 2003 onwards the trait name was changed and the binary scoring system introduced (1 = none or rudimentary/deficiens), 2 = full).

Further edits were made using R (R Core Team, 2024) to convert all ambiguous or missing scores (scored as ‘0’ and ‘255’) to NA. Scores of six-row barley genotypes for the national characteristic 20 (Sterile spikelet: attitude) and 22 (Ear: development of sterile spikelets) were marked as NA. The DUS characteristics 2, 86, and 76, were scored on a ‘1’ or ‘9’ basis, for downstream analyses ‘9’ scores were converted to ‘2’ to reduce bias. For the national characteristic 90 (Seasonal type),‘alternative’ scores were marked as NA and the spring types were converted from ‘3’ to ‘2’, this was completed to remove the alternative state of expression, due to limited number of genotypes with this characteristic state.
