# Supplementary material
Source: Research Square preprint supplement (doi:10.21203/rs.3.rs-9584886/v1)
Supplement: Supplementary file 3 [file f03c22508d12724498578251.xlsx]

## Sheet: Supplementary Table 1
Supplementary Table 1. The DUS characteristics class widths used in the 'similar variety selection' approach.
Characteristic no.	Class Width
1	3
2	1
8	3
9	3
10	3
14	3
15	3
17	3
19	3
20	2
22	1
25	2
29	3
30	3
33	3
39	1
40	3
41	3
44	3
46	3
62	2
65	1
73	3
75	3
76	1
86	1
88	1
90	2

## Sheet: Supplementary Table 2
Supplementary Table 2. Extended results table for major QTL (-log10(P) > 10) mapped using the barley prediction panel. For each QTL, the peak marker effect and -log10(P) is shown and the associated trait heritability (h2) is provided for each DUS characteristic. The Bonferroni genome-wide significance threshold (Threshold) is presented, as well is the peak marker (Marker) and the location of that…
Characteristic no.	Description	h2	Threshold	Marker	Chromosome	Position	Ref	Alt	-log10(P)	Effect	Candidate locus	Candidate gene	Gene Chr	V3 Pos. (Mbp)	V3 Gene model ID V3	V2 Pos (Mb)	V2 (TRITEX)	Refs
2	Lower leaves: hairiness of leaf sheaths	0.971631	5.57	JHI.Hv50k.2016.269262	4H	631633338	0	1	180.92	-0.763275	HSH1	GWAS hit (SNP_708353)	4H	597.929	HORVU.MOREX.r3.4HG0413860	612.217	Intergenic	Cockram et al. 2010; Cockram et al. 2012; Kim et al. 2023
10	Flag leaf: intensity of anth. colour. of auricles	0.720612	5.56	JHI.Hv50k.2016.110602	2H	676851667	0	1	78.89	-4.43604	ANT2	bHLH	2H	593.493	HORVU.MOREX.r3.2HG0188710	602.218	HORVU.MOREX.r2.2HG0156270
14	Ear: glaucosity	0.421925	5.57	SCRI_RS_204276	1H	248411	0	1	12.11	1.45809	GLS1	GWAS hit (12_30969)	1H	0.378	HORVU.MOREX.r3.1HG0000130	0.939	HORVU.MOREX.r2.1HG0000280	De la Fuente Cantó et al. 2018
19	Awns: intensity of anthocyanin colour. of tips	0.660492	5.56	JHI.Hv50k.2016.110602	2H	676851667	0	1	94.73	-4.55452	ANT2	bHLH	2H	593.493	HORVU.MOREX.r3.2HG0188710	602.218	HORVU.MOREX.r2.2HG0156270
20	Sterile spikelet: attitude	0.640778	5.49	JHI.Hv50k.2016.28062	1H	394166483	0	1	16.92	-0.763631	VRS3 (Int-A)	HvJMJ706	1H	358.254	HORVU.MOREX.r3.1HG0053590	359.071	HORVU.MOREX.r2.1HG0041980
20	Sterile spikelet: attitude	0.640778	5.49	JHI.Hv50k.2016.108012	2H	654157564	0	1	41.94	1.48223	Vrs1	HvHOX1	2H	570.803	HORVU.MOREX.r3.2HG0184740.1	581.367	HORVU.MOREX.r2.2HG0152930.1
22	Ear: development of sterile spikelets	0.824041	5.52	JHI.Hv50k.2016.107661	2H	651539496	0	1	203.18	-1.00699	Vrs1	HvHOX1	2H	570.803	HORVU.MOREX.r3.2HG0184740.1	581.367	HORVU.MOREX.r2.2HG0152930.1
25	Median spikelet: length of glume+awn cf grain	0.242663	5.57	JHI.Hv50k.2016.460699	7H	42951647	0	1	30.63	-0.963912	N/A	GWAS hit (SNP_1172437)	7H	44.711	HORVU.MOREX.r3.7HG0654930	40.894	HORVU.MOREX.r2.7HG0543420	Kim et al. 2023
39	Ear: number of rows	1	5.57	JHI.Hv50k.2016.16862	1H	28824035	0	1	10.22	-0.079605
39	Ear: number of rows	1	5.57	JHI.Hv50k.2016.44059	1H	518171392	0	1	14.72	0.123025	EAM8	HvELF3	1H	515.211	HORVU.MOREX.r3.1HG0095050	521.088	HORVU.MOREX.r2.1HG0078390	Faure et al. 2012
39	Ear: number of rows	1	5.57	JHI.Hv50k.2016.107123	2H	649821590	0	1	307.65	-0.846299	Vrs1	HvHOX1	2H	570.803	HORVU.MOREX.r3.2HG0184740.1	581.367	HORVU.MOREX.r2.2HG0152930.1
39	Ear: number of rows	1	5.57	JHI.Hv50k.2016.231492	4H	19763503	0	1	307.65	-0.895188	Int-C (Vrs5)	HvTB1	4H	15.792	HORVU.MOREX.r3.4HG0336690.1	16.547	HORVU.MOREX.r2.4HG0280760.1
39	Ear: number of rows	1	5.57	JHI.Hv50k.2016.288224	5H	34677519	0	1	10.27	-0.141547
39	Ear: number of rows	1	5.57	BOPA2_12_20793	7H	39718323	0	1	21.64	0.120491	VRN-H3	FT1	7H	38.305	HORVU.MOREX.r3.7HG0653910	38.306	HORVU.MOREX.r2.7HG0542540
62	Kernel: colour of aleurone layer	0.757504	5.54	JHI.Hv50k.2016.250677	4H	524864313	0	1	134.95	-1.41538	BLX	(1) HvMyc2; (2) HvMpc2	4H	507.301; 602.891	HORVU.MOREX.r3.4HG0392660; HORVU.MOREX.r2.4HG0341970.1	519.413; 589.054	HORVU.MOREX.r2.4HG0326660; HORVU.MOREX.r3.4HG0410500	Strygina et al. 2017
65	Grain: rachilla hair type	0.93	5.57	JHI.Hv50k.2016.316002	5H	546260097	0	1	177.92	-0.891624	SRH1	HvSRH1	5H	484.351	HORVU.MOREX.r3.5HG0492730	492.271	Intergenic	Jayakodi et al. 2024
73	Grain: spiculation of inner lateral nerves	0.751897	5.57	JHI.Hv50k.2016.104839	2H	639289447	0	1	71.96	-3.67508	GTH1	GWAS hit (Hv11_10818_CA)	2H	558.316	HORVU.MOREX.r3.2HG0181550	568.406	HORVU.MOREX.r2.2HG0150160	Cockram et al. 2010; Cockram et al. 2012
75	Grain: anthocyanin colouration of lemma nerves	0.616882	5.57	SCRI_RS_160618	2H	676848238	0	1	64.6	-2.89598	ANT2	bHLH	2H	593.493	HORVU.MOREX.r3.2HG0188710	602.218	HORVU.MOREX.r2.2HG0156270
76	Grain: hairiness of ventral furrow	0.988594	5.57	JHI.Hv50k.2016.367872	6H	330411	0	1	146.16	-0.842445	N/A	GWAS hit (HvOs02g01490_G607A)	6H	0.009	HORVU.MOREX.r3.6HG0541510	0.008	HORVU.MOREX.r2.6HG0450320	Cockram et al. 2010; Cockram et al. 2012
90	Seasonal type	1	5.56	JHI.Hv50k.2016.41782	1H	511924294	0	1	133.93	0.656492	PPD-H2	HvFT3	1H	447.768	HORVU.MOREX.r3.1HG0077240.1	482.167	HORVU.MOREX.r2.1HG0062650.1	Faure et al. 2007
90	Seasonal type	1	5.56	JHI.Hv50k.2016.275319	4H	643513006	0	1	214.94	0.712243	VRN-H2	ZCCTabc	4H	604.14	based on HORVU.MOREX.r3.4HG0416190 (WD40)	618.59	based on HORVU.MOREX.r2.4HG0346920 (WD40)
90	Seasonal type	1	5.56	JHI.Hv50k.2016.323294	5H	571615210	0	1	14.53	0.144759	VRN-H1	HvBM5A	5H	528.158	HORVU.MOREX.r3.5HG0511210	537.289	HORVU.MOREX.r2.5HG0424650.1	Distelfeld and Dubcovsky 2009
90	Seasonal type	1	5.56	JHI.Hv50k.2016.336854	5H	601232579	0	1	57.84	-0.457114			5H
